# Supplementary material for: Correlation of age of onset and clinical severity in Niemann–Pick disease type C1 with lysosomal abnormalities and gene expression
Source: PubMed Central journal article supplement (PMC8828765; doi:10.1038/s41598-022-06112-y), 2022-02-09
Supplement: 41598_2022_6112_MOESM1_ESM.pdf [file 41598_2022_6112_MOESM1_ESM.pdf]

## Correlation of age of onset and clinical severity in Niemann-Pick disease type C1 with lysosomal abnormalities and gene expression

Laura L. Baxter, Dawn E. Watkins-Chow, Nicholas L. Johnson, Nicole Y. Farhat, Frances M. Platt, Ryan K. Dale, Forbes D. Porter, William J. Pavan, Jorge L. Rodriguez-Gil

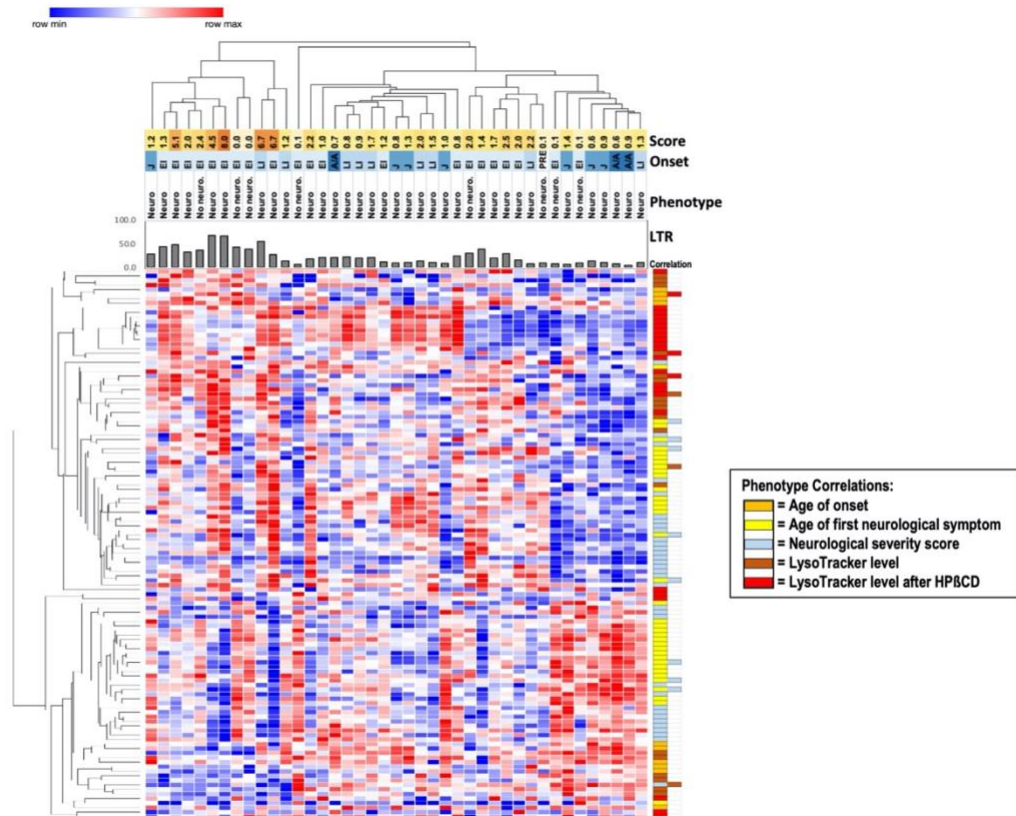

**Supplementary Figure 1. Hierarchical clustering of the genes significantly correlated with age of onset, neurological severity score, or LysoTracker levels.** Cell lines from NPC1 patient fibroblasts are shown in columns, and variance stabilized read count values for gene expression values for the significantly correlated genes are shown in rows. Neurological severity scores for each patient are shown in the yellow to orange heatmap, with darker colors indicating higher scores/greater severity. Age of onset is shown in the blue heatmap, with darker blues indicating older ages: EI = early infantile, LI = late infantile, J = juvenile, A/A = adolescent/adult, PRE = presymptomatic. Bar graph indicates LysoTracker (LTR) levels in untreated fibroblasts. Correlation (column to right of heatmap) indicates what clinical phenotype or cellular phenotype correlated with gene expression levels; two colored boxes for a gene represent correlation with two phenotypes. Note the clustering of genes correlated with the age of first neurological symptom (yellow correlation labels), as well as clustering of genes correlated with the change in LysoTracker levels following HPβCD treatment (red correlation labels). The genes correlated with the age of first neurological symptom are those shown in Figure 4.

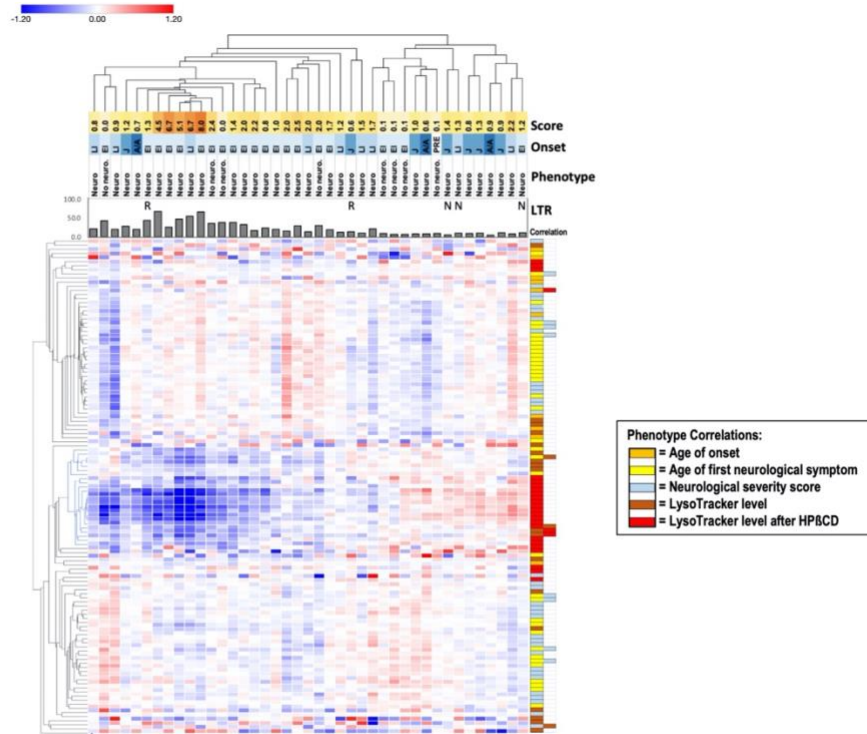

**Supplementary Figure 2. Hierarchical clustering of gene expression differences seen after HPβCD treatment.** The values shown are the difference between variance stabilized counts after HPβCD treatment and in untreated cells ( $\Delta$ HPβCD values). Cell lines from NPC1 patient fibroblasts are shown in columns. Blue represents lower gene expression levels, reflecting a reduction in expression levels following HPβCD treatment. Neurological severity scores for each patient are shown in the yellow to orange heatmap, with darker colors indicating higher scores/greater severity. Age of onset is shown in the blue heatmap, with darker blues indicating older ages: EI = early infantile, LI = late infantile, J = juvenile, A/A = adolescent/adult, PRE = presymptomatic. Bar graph indicates LysoTracker (LTR) levels in untreated fibroblasts. Correlation (column to right of heatmap) indicates what clinical phenotype or cellular phenotype correlated with gene expression levels; two colored boxes for a gene indicate correlation with two phenotypes. Note the clustering of genes with lower expression (darker blue heatmap region, left); many of these genes are significantly correlated with the LysoTracker level following HPβCD treatment (red correlation labels). The 24 genes within this cluster (highlighted by blue brackets) are shown in Figure 5.

Supplementary Table 1. Genes which showed significant correlation of expression levels with clinical phenotypes or LysoTracker staining cellular phenotypes.

| Gene ID         | Symbol          | Gene description                                                                     | Spearman rho values <sup>1</sup>  |              |                    |                   |                               | LysoTracker change after HPCD                                                                                                                                                                                                                                                                                                                                                                                                                                                                                                                                                                                                                                                                                                                                                                                                                                                                                                                                                                       | Function                                                                                                                                                                                                                                                                                        | Neurological disease association |
|-----------------|-----------------|--------------------------------------------------------------------------------------|-----------------------------------|--------------|--------------------|-------------------|-------------------------------|-----------------------------------------------------------------------------------------------------------------------------------------------------------------------------------------------------------------------------------------------------------------------------------------------------------------------------------------------------------------------------------------------------------------------------------------------------------------------------------------------------------------------------------------------------------------------------------------------------------------------------------------------------------------------------------------------------------------------------------------------------------------------------------------------------------------------------------------------------------------------------------------------------------------------------------------------------------------------------------------------------|-------------------------------------------------------------------------------------------------------------------------------------------------------------------------------------------------------------------------------------------------------------------------------------------------|----------------------------------|
|                 |                 |                                                                                      | Age of first neurological symptom | Age of onset | Age-adjusted score | LysoTracker level | LysoTracker change after HPCD |                                                                                                                                                                                                                                                                                                                                                                                                                                                                                                                                                                                                                                                                                                                                                                                                                                                                                                                                                                                                     |                                                                                                                                                                                                                                                                                                 |                                  |
| ENSG00000135541 | AH1             | Abelson helper integration site 1                                                    | 0.725                             | 0.194        | -0.572             | -0.374            | 0.239                         | important for cerebellar development, PMID:15322546, mutated in Joubert syndrome (also known as Joubertin), PMID:15467982; is high susceptibility gene for autism, schizophrenia, PMID:18782849; deficiency linked to depression; encodes cilia-related protein                                                                                                                                                                                                                                                                                                                                                                                                                                                                                                                                                                                                                                                                                                                                     | Mutations associated with Joubert syndrome 3; OMIM #608629                                                                                                                                                                                                                                      |                                  |
| ENSG00000113595 | TRIM23          | tripartite motif containing 23                                                       | 0.687                             | 0.420        | -0.516             | -0.467            | 0.160                         | Exhibits both E3 ubiquitin ligase and GTPase activities; mediates autophagy in response to viral infection, PMID:31189704; Part of innate immune system; a.k.a. ARD1                                                                                                                                                                                                                                                                                                                                                                                                                                                                                                                                                                                                                                                                                                                                                                                                                                |                                                                                                                                                                                                                                                                                                 |                                  |
| ENSG00000134318 | ROCK2           | Rho associated coiled-coil containing protein kinase 2                               | 0.680                             | 0.288        | -0.398             | -0.422            | 0.077                         | Kinase that regulates cytokinesis, actin skeleton & dendrite structure/function; inhibition alters dendritic spine morphology; inhibition in Npc1-/- cells reduced growth cone collapse, PMID:20386595; specific ROCK2 inhibition enhanced neurite outgrowth of retinal ganglion cells on inhibitory substrates and induced substantial neuronal regeneration, PMID:24832597; in germinal center B cells, ROCK2 induced expression of mevalonate pathway enzymes by controlling the activity of SREBP2, the master regulator of cholesterol biosynthesis, PMID:32229726; mouse ko suggests "ROCK2 contributes to atherosclerosis, in part, by inhibiting peroxisome proliferator-activated receptor-γ-mediated reverse cholesterol transport in macrophages, which contributes to foam cell formation," PMID:23011471; inhibition upregulates neuroprotective Parkin-mediated mitophagy, PMID:31900402; inhibition suppressed β-amyloid production in Alzheimer disease mouse model, PMID: 24305806 | Proposed as possible target for Alzheimer Disease because ROCK2 inhibition increases autophagy, also proposed as general target for neurological disease treatment, PMID:33790742, 24832597; many other refs                                                                                    |                                  |
| ENSG00000121879 | PIK3CA          | phosphatidylinositol-4,5-bisphosphate 3-kinase catalytic subunit alpha               | 0.674                             | 0.230        | -0.514             | -0.362            | 0.255                         | Oncogenic for a wide variety of cancers; one study suggested PIK3CA amplification in triple-negative breast cancer was associated with higher expression of cholesterol-related genes; PMID:33243007                                                                                                                                                                                                                                                                                                                                                                                                                                                                                                                                                                                                                                                                                                                                                                                                |                                                                                                                                                                                                                                                                                                 |                                  |
| ENSG00000151116 | UEVLD           | UEV and lactate/malate dehydrogenase domains                                         | 0.658                             | 0.259        | -0.480             | -0.315            | 0.137                         | Function unclear; sequence similarities to inactive E2 ubiquitin conjugating enzymes; regulates synaptogenesis in c. elegans; a.k.a. uev-3, PMID:20592265                                                                                                                                                                                                                                                                                                                                                                                                                                                                                                                                                                                                                                                                                                                                                                                                                                           |                                                                                                                                                                                                                                                                                                 |                                  |
| ENSG00000144426 | NBEAL1          | neurobeachin like 1                                                                  | 0.648                             | 0.219        | -0.481             | -0.254            | 0.290                         | Golgi-associated protein, regulates cholesterol metabolism; k.d. reduces LDLR, HMGCS, and HMGCR expression, mechanism involves binding with SCAP and PARG3 and effect on subsequent SREBP2-processing; contains BEACH domain (Beige and Chediak-Higashi); Human NBEAL1 genetic variants that exhibit reduced expression in coronary arteries are associated with coronary artery disease (PMID: 32161285)                                                                                                                                                                                                                                                                                                                                                                                                                                                                                                                                                                                           |                                                                                                                                                                                                                                                                                                 |                                  |
| ENSG00000048649 | RSF1            | remodelling and spacing factor 1                                                     | 0.640                             | 0.264        | -0.547             | -0.389            | 0.078                         | Chromatin remodelling factor, also a repressor and tx activator with Hepatitis B virus X protein                                                                                                                                                                                                                                                                                                                                                                                                                                                                                                                                                                                                                                                                                                                                                                                                                                                                                                    |                                                                                                                                                                                                                                                                                                 |                                  |
| ENSG00000039319 | ZFYVE16         | zinc finger FYVE-type containing 16                                                  | 0.638                             | 0.189        | -0.547             | -0.365            | 0.052                         | Endosomal protein (a.k.a. endofin); may regulate endosomal trafficking; facilitates TGFβ signaling                                                                                                                                                                                                                                                                                                                                                                                                                                                                                                                                                                                                                                                                                                                                                                                                                                                                                                  |                                                                                                                                                                                                                                                                                                 |                                  |
| ENSG00000122008 | POLK            | DNA polymerase kappa                                                                 | 0.631                             | 0.286        | -0.499             | -0.368            | 0.140                         | Specialized polymerase, which functions in DNA repair; cell lines lacking POLK show increased susceptibility to oxidative damage; associated with lung and breast cancer                                                                                                                                                                                                                                                                                                                                                                                                                                                                                                                                                                                                                                                                                                                                                                                                                            |                                                                                                                                                                                                                                                                                                 |                                  |
| ENSG00000157181 | ODR4            | odr-4 GPCR localization factor homolog                                               | 0.624                             | 0.188        | -0.607             | -0.360            | 0.001                         | Olfactory receptor, G-protein coupled receptor in ER, Overexpressed in lung adenocarcinoma, PMID:33251353, 24603482                                                                                                                                                                                                                                                                                                                                                                                                                                                                                                                                                                                                                                                                                                                                                                                                                                                                                 |                                                                                                                                                                                                                                                                                                 |                                  |
| ENSG00000130600 | H19             | H19 Imprinted maternally expressed transcript                                        | 0.623                             | -0.142       | -0.366             | 0.128             | 0.066                         | Located at same genomic locus as insulin-like growth factor 2 (IGF2); long non-coding RNA that can act as tumor suppressor; Mutations associated with Beckwith-Wiedemann syndrome and Wilms' tumorigenesis; increased expression in serum from diabetic patients; PMID:32345662; high expression in a variety of liver diseases, PMID:33227504; suggested to play a role in regulation of angiogenesis, adipocyte differentiation, lipid metabolism, inflammatory response, cellular proliferation and apoptosis, PMID:32698876; also promotes autophagy (multiple articles)                                                                                                                                                                                                                                                                                                                                                                                                                        |                                                                                                                                                                                                                                                                                                 |                                  |
| ENSG00000181819 | ENSG00000181819 | potassium channel tetramerization domain containing 9 pseudogene 2                   | 0.619                             | -0.037       | -0.400             | -0.291            | 0.006                         | Pseudogene; a.k.a. KCTD9P2                                                                                                                                                                                                                                                                                                                                                                                                                                                                                                                                                                                                                                                                                                                                                                                                                                                                                                                                                                          |                                                                                                                                                                                                                                                                                                 |                                  |
| ENSG00000145734 | BDP1            | B double prime 1, subunit of RNA polymerase III transcription initiation factor IIIB | 0.611                             | 0.087        | -0.423             | -0.247            | 0.182                         | Encodes a subunit of the TFIIB transcription initiation complex                                                                                                                                                                                                                                                                                                                                                                                                                                                                                                                                                                                                                                                                                                                                                                                                                                                                                                                                     |                                                                                                                                                                                                                                                                                                 |                                  |
| ENSG00000174796 | THAP5           | THAP domain containing 6                                                             | 0.600                             | 0.242        | -0.548             | -0.376            | 0.148                         | Function unclear                                                                                                                                                                                                                                                                                                                                                                                                                                                                                                                                                                                                                                                                                                                                                                                                                                                                                                                                                                                    |                                                                                                                                                                                                                                                                                                 |                                  |
| ENSG00000109618 | SEPS5C5         | Sep (O-phosphoserine) tRNA:Sec (selenocysteine) tRNA synthase                        | 0.598                             | 0.299        | -0.503             | -0.374            | 0.093                         | Acts in final step of synthesis of the 21st amino acid, selenocysteine (sec), which can be added at a UGA codon (termination alternate), PMID:27473727, 24987004                                                                                                                                                                                                                                                                                                                                                                                                                                                                                                                                                                                                                                                                                                                                                                                                                                    |                                                                                                                                                                                                                                                                                                 |                                  |
| ENSG00000123977 | DAW1            | dawin assembly factor with WD repeats 1                                              | 0.597                             | 0.167        | -0.554             | -0.336            | -0.025                        | Important for cilia motility and dynein assembly; a.k.a. ODA16                                                                                                                                                                                                                                                                                                                                                                                                                                                                                                                                                                                                                                                                                                                                                                                                                                                                                                                                      |                                                                                                                                                                                                                                                                                                 |                                  |
| ENSG00000242314 | ENSG00000242314 | ribosomal protein L12 pseudogene 32                                                  | 0.596                             | -0.019       | -0.286             | -0.162            | -0.300                        | Pseudogene; a.k.a. RPL12P32                                                                                                                                                                                                                                                                                                                                                                                                                                                                                                                                                                                                                                                                                                                                                                                                                                                                                                                                                                         |                                                                                                                                                                                                                                                                                                 |                                  |
| ENSG00000168944 | CEP120          | centrosomal protein 120                                                              | 0.595                             | 0.116        | -0.419             | -0.245            | 0.181                         | Required for centriole elongation from a procentriole, PMID:23857771                                                                                                                                                                                                                                                                                                                                                                                                                                                                                                                                                                                                                                                                                                                                                                                                                                                                                                                                | Mutation associated with Joubert syndrome 31; OMIM #617761; PMID: 27208211                                                                                                                                                                                                                      |                                  |
| ENSG00000136758 | YME1L1          | YME1 like 1 ATPase                                                                   | 0.594                             | 0.172        | -0.598             | -0.353            | 0.269                         | Mitochondrial protein; part of the mTORC1-LIPIN1-YME1L1 axis, which regulates mitochondrial proteostasis in response to metabolic changes, such as hypoxia or nutrient starvation, PMID:31695197                                                                                                                                                                                                                                                                                                                                                                                                                                                                                                                                                                                                                                                                                                                                                                                                    |                                                                                                                                                                                                                                                                                                 |                                  |
| ENSG00000110330 | BIRC2           | baculoviral IAP repeat containing 2                                                  | 0.594                             | 0.082        | -0.425             | -0.247            | 0.295                         | Apoptosis inhibitor                                                                                                                                                                                                                                                                                                                                                                                                                                                                                                                                                                                                                                                                                                                                                                                                                                                                                                                                                                                 |                                                                                                                                                                                                                                                                                                 |                                  |
| ENSG00000108510 | MED13           | mediator complex subunit 13                                                          | 0.592                             | 0.058        | -0.463             | -0.288            | 0.085                         | Component of the mediator complex, which acts in tx co-activation/repression; associated with glucose homeostasis, liver metabolism, and lipid metabolism, PMID: 26883362, 25422356                                                                                                                                                                                                                                                                                                                                                                                                                                                                                                                                                                                                                                                                                                                                                                                                                 | Mutations associated with Intellectual developmental disorder 61; OMIM #618009                                                                                                                                                                                                                  |                                  |
| ENSG00000138738 | PRDM5           | PR/SET domain 5                                                                      | 0.561                             | 0.345        | -0.649             | -0.392            | 0.136                         | Tx factor, Kruppel-like zinc finger; putative tx repressor                                                                                                                                                                                                                                                                                                                                                                                                                                                                                                                                                                                                                                                                                                                                                                                                                                                                                                                                          |                                                                                                                                                                                                                                                                                                 |                                  |
| ENSG00000148481 | MINDY3          | MINDY (lysin 48 deubiquitinase 3)                                                    | 0.543                             | 0.209        | -0.679             | -0.384            | 0.125                         | Possible tumor suppressor in non-small cell lung cancer; a.k.a. C10orf97                                                                                                                                                                                                                                                                                                                                                                                                                                                                                                                                                                                                                                                                                                                                                                                                                                                                                                                            |                                                                                                                                                                                                                                                                                                 |                                  |
| ENSG00000134294 | SLC38A2         | solute carrier family 38 member 2                                                    | 0.542                             | 0.302        | -0.608             | -0.469            | 0.208                         | Amino acid transporter in system A; shows sodium dependence, preference for short-chain neutral amino acids, such as alanine, serine, proline, and glutamine, as substrates, pH sensitivity, and transinhibition; regulated in response to nutritional changes, expression in liver important, and modulates systemic lipid metabolism, PMID:26268630                                                                                                                                                                                                                                                                                                                                                                                                                                                                                                                                                                                                                                               |                                                                                                                                                                                                                                                                                                 |                                  |
| ENSG00000113597 | TRAPP13         | trafficking protein particle complex 13                                              | 0.532                             | 0.346        | -0.597             | -0.388            | 0.095                         | Modulates autophagy and golgi stress response, k.d. reduces autophagy response, PMID:28536105; part of the TRAPP13 complex, which regulates membrane trafficking                                                                                                                                                                                                                                                                                                                                                                                                                                                                                                                                                                                                                                                                                                                                                                                                                                    |                                                                                                                                                                                                                                                                                                 |                                  |
| ENSG00000196950 | SLC39A10        | solute carrier family 39 member 10                                                   | 0.490                             | 0.127        | -0.633             | -0.383            | 0.270                         | Zinc transporter; role in immune system/macrophage function, cell division, lipid metabolism; a.k.a. ZIP10                                                                                                                                                                                                                                                                                                                                                                                                                                                                                                                                                                                                                                                                                                                                                                                                                                                                                          |                                                                                                                                                                                                                                                                                                 |                                  |
| ENSG00000116447 | UHRF1BP1L       | UHRF1 binding protein 1 like                                                         | 0.486                             | 0.435        | -0.560             | -0.413            | 0.201                         | Binds Syntaxin 6 and has suggested role in trafficking through the early/recycling endosomal system, PMID:20163565, a.k.a. SHP154                                                                                                                                                                                                                                                                                                                                                                                                                                                                                                                                                                                                                                                                                                                                                                                                                                                                   |                                                                                                                                                                                                                                                                                                 |                                  |
| ENSG00000165156 | ZHX1            | zinc fingers and homeoboxes 1                                                        | 0.476                             | 0.304        | -0.639             | -0.482            | 0.174                         | Tx repressor, proposed role in cancer                                                                                                                                                                                                                                                                                                                                                                                                                                                                                                                                                                                                                                                                                                                                                                                                                                                                                                                                                               |                                                                                                                                                                                                                                                                                                 |                                  |
| ENSG00000170074 | FAM153A         | family with sequence similarity 153 member A                                         | 0.459                             | 0.161        | -0.605             | -0.249            | -0.212                        | Function unclear                                                                                                                                                                                                                                                                                                                                                                                                                                                                                                                                                                                                                                                                                                                                                                                                                                                                                                                                                                                    |                                                                                                                                                                                                                                                                                                 |                                  |
| ENSG00000124212 | PTGIS           | prostaglandin I2 synthase                                                            | 0.454                             | 0.348        | -0.591             | -0.597            | -0.070                        | ER protein that catalyzes the conversion of prostaglandin H2 to prostacyclin (prostaglandin I2); imbalance of prostacyclin and its antagonist thromboxane A2 contribute to the development of myocardial infarction, stroke, and atherosclerosis; upregulated expression in NPC1 patients, PMID: 31927669                                                                                                                                                                                                                                                                                                                                                                                                                                                                                                                                                                                                                                                                                           |                                                                                                                                                                                                                                                                                                 |                                  |
| ENSG00000196967 | ZNF585A         | zinc finger protein 585A                                                             | 0.453                             | 0.627        | -0.376             | -0.365            | 0.109                         | Zinc finger protein; function unclear                                                                                                                                                                                                                                                                                                                                                                                                                                                                                                                                                                                                                                                                                                                                                                                                                                                                                                                                                               |                                                                                                                                                                                                                                                                                                 |                                  |
| ENSG00000177234 | LINC01561       | long intergenic non-protein coding RNA 1561                                          | 0.449                             | 0.278        | -0.410             | -0.595            | -0.142                        | May promote non-small cell lung carcinoma and breast cancer                                                                                                                                                                                                                                                                                                                                                                                                                                                                                                                                                                                                                                                                                                                                                                                                                                                                                                                                         |                                                                                                                                                                                                                                                                                                 |                                  |
| ENSG00000112174 | MBTPS2          | membrane bound transcription factor peptidase, site 2                                | 0.429                             | 0.315        | -0.593             | -0.368            | 0.226                         | Encodes membrane-embedded zinc metalloprotease that activates signaling proteins involved in sterol control of transcription and ER stress response, PMID:23571157                                                                                                                                                                                                                                                                                                                                                                                                                                                                                                                                                                                                                                                                                                                                                                                                                                  | Associated with X-linked IFAP syndrome with or without BRESHECK syndrome, which is linked to a quantitative decrease in cholesterol homeostasis and ER stress response, OMIM #308205                                                                                                            |                                  |
| ENSG00000120370 | GORAB           | golgin, RAB6 interacting                                                             | 0.425                             | 0.194        | -0.634             | -0.295            | 0.136                         | Localized to trans-golgi; may function in vesicle tethering, based on homology to golgin family members; also binds centromere protein 56 to regulate centriole duplication, PMID:33704067                                                                                                                                                                                                                                                                                                                                                                                                                                                                                                                                                                                                                                                                                                                                                                                                          | Associated with geroderma osteodysplastica, which shows appearance of premature aging and skin wrinkling, but also has neurological features of speech delay and mental retardation, disease also described as cutis laxa, OMIM #3131070; PMID:23963297                                         |                                  |
| ENSG00000162368 | CMPK1           | cytidine/uridine monophosphate kinase 1                                              | 0.399                             | 0.195        | -0.603             | -0.273            | 0.231                         | Enzyme in nucleic acid biosynthesis                                                                                                                                                                                                                                                                                                                                                                                                                                                                                                                                                                                                                                                                                                                                                                                                                                                                                                                                                                 |                                                                                                                                                                                                                                                                                                 |                                  |
| ENSG00000136143 | SUCLA2          | succinate-CoA ligase ADP-forming subunit beta                                        | 0.395                             | 0.223        | -0.640             | -0.289            | 0.264                         | Encodes a mitochondrial matrix enzyme that catalyzes the reversible synthesis of succinyl-CoA from succinate and CoA,                                                                                                                                                                                                                                                                                                                                                                                                                                                                                                                                                                                                                                                                                                                                                                                                                                                                               | Mutation associated with a childhood-fatal encephalomyopathy, some patients show complex forms of this disorder with neurological involvement, PMID: 27651038, 33231368                                                                                                                         |                                  |
| ENSG00000237984 | PTENP1          | phosphatase and tensin homolog pseudogene 1                                          | 0.380                             | 0.365        | -0.363             | -0.625            | -0.061                        | Processed pseudogene of the tumor suppressor PTEN; can act as a tumor suppressor                                                                                                                                                                                                                                                                                                                                                                                                                                                                                                                                                                                                                                                                                                                                                                                                                                                                                                                    |                                                                                                                                                                                                                                                                                                 |                                  |
| ENSG00000188641 | DPYD            | dihydropyrimidine dehydrogenase                                                      | 0.341                             | 0.223        | -0.644             | -0.246            | 0.111                         | Initial and rate-limiting enzyme in the catabolism of the pyrimidine bases uracil and thymine; mutations associated with adverse reactions to chemotherapy drugs                                                                                                                                                                                                                                                                                                                                                                                                                                                                                                                                                                                                                                                                                                                                                                                                                                    | Mutation associated with Dihydropyrimidine dehydrogenase deficiency, which has a wide phenotypic variability, which can include neurological symptoms, OMIM #274270; possible personality disorder, bipolar disorder, major depression, and schizophrenia association, PMID: 23042115, 28632202 |                                  |
| ENSG00000237708 | ENSG00000237708 | SPIN2 family pseudogene 1                                                            | 0.325                             | -0.156       | -0.538             | -0.184            | -0.319                        | Pseudogene; a.k.a. SPIN2P1                                                                                                                                                                                                                                                                                                                                                                                                                                                                                                                                                                                                                                                                                                                                                                                                                                                                                                                                                                          |                                                                                                                                                                                                                                                                                                 |                                  |
| ENSG00000152492 | CCDC50          | coiled-coil domain containing 50                                                     | 0.298                             | 0.594        | -0.240             | -0.567            | 0.129                         | Highly expressed in neuronal cells, and regulates neurite outgrowth and neuronal development, PMID: 33277610                                                                                                                                                                                                                                                                                                                                                                                                                                                                                                                                                                                                                                                                                                                                                                                                                                                                                        |                                                                                                                                                                                                                                                                                                 |                                  |
| ENSG00000144113 | BBIP1           | BBSome interacting protein 1                                                         | 0.294                             | 0.610        | -0.362             | -0.364            | -0.100                        | Bosome protein, function in trafficking to cilia                                                                                                                                                                                                                                                                                                                                                                                                                                                                                                                                                                                                                                                                                                                                                                                                                                                                                                                                                    | Mutated in Bardet-Biedl syndrome 18; OMIM #615995; PMID:24026985, 32055034                                                                                                                                                                                                                      |                                  |
| ENSG00000081307 | UBA5            | ubiquitin like modifier activating enzyme 5                                          | 0.274                             | 0.342        | -0.664             | -0.237            | 0.093                         | Regulates ubiquitin fold modifier pathway                                                                                                                                                                                                                                                                                                                                                                                                                                                                                                                                                                                                                                                                                                                                                                                                                                                                                                                                                           | Bi-allelic mutations associated with developmental and epileptic encephalopathy-44 (DEE44), OMIM #617132; other neurological disorders also reported, including a cerebellar ataxia PMID:25872069, 33853163                                                                                     |                                  |
| ENSG00000188958 | UTS2B           | urotensin 2B                                                                         | 0.264                             | 0.668        | -0.144             | -0.468            | -0.027                        | Member of the somatostatin family; encodes an 8 amino acid neuropeptide that regulates blood pressure and renal function                                                                                                                                                                                                                                                                                                                                                                                                                                                                                                                                                                                                                                                                                                                                                                                                                                                                            |                                                                                                                                                                                                                                                                                                 |                                  |
| ENSG00000239474 | KLHL41          | kelch like family member 41                                                          | 0.256                             | 0.595        | -0.294             | -0.362            | -0.046                        | Substrate adaptor for E3 ubiquitin ligase Cullin-3; regulates skeletal muscle differentiation; homozygous or biallelic mutation associated with nemaline myopathy-9 (NEM9), a muscle disorder with muscle weakness, PMID:24286659                                                                                                                                                                                                                                                                                                                                                                                                                                                                                                                                                                                                                                                                                                                                                                   |                                                                                                                                                                                                                                                                                                 |                                  |
| ENSG00000264230 | ANXA8L1         | annexin A8 like 1                                                                    | 0.249                             | 0.423        | -0.428             | -0.631            | -0.078                        | Annexin family member; may function as an anticoagulant that indirectly inhibits the thromboplastin-specific complex; overexpression associated with acute myelocytic leukemia                                                                                                                                                                                                                                                                                                                                                                                                                                                                                                                                                                                                                                                                                                                                                                                                                      |                                                                                                                                                                                                                                                                                                 |                                  |
| ENSG00000105497 | ZNF175          | zinc finger protein 175                                                              | 0.217                             | 0.580        | -0.430             | -0.677            | -0.139                        | A.k.a. OTK18; zinc finger protein, ubiquitous tx repressor; involved in HIV-1 replication; possible role in innate immunity, PMID: 18776638; suggested role in neuronal survival, PMID: 19247725                                                                                                                                                                                                                                                                                                                                                                                                                                                                                                                                                                                                                                                                                                                                                                                                    |                                                                                                                                                                                                                                                                                                 |                                  |
| ENSG00000126889 | TLR4            | toll like receptor 4                                                                 | 0.212                             | 0.584        | -0.240             | -0.698            | 0.050                         | Component of the innate immune system; endosomal accumulation of TLR4 seen in NPC1 fibroblasts and NPC1-/- mice, PMID: 17314284; activated in LSD Fabry disease; PMID: 33047250, 25690728; regulates autophagy                                                                                                                                                                                                                                                                                                                                                                                                                                                                                                                                                                                                                                                                                                                                                                                      |                                                                                                                                                                                                                                                                                                 |                                  |
| ENSG00000255945 | ENSG00000255945 | novel transcript                                                                     | 0.180                             | 0.357        | -0.212             | -0.261            | -0.342                        | Long non-coding RNA, function unclear                                                                                                                                                                                                                                                                                                                                                                                                                                                                                                                                                                                                                                                                                                                                                                                                                                                                                                                                                               |                                                                                                                                                                                                                                                                                                 |                                  |
| ENSG00000182575 | NXP3            | neurexophilin 3                                                                      | 0.177                             | 0.195        | -0.179             | -0.586            | 0.229                         | Glycoprotein, highly expressed in cerebellum and cortex; important for efficient neurotransmitter release, acts as a secreted peptide                                                                                                                                                                                                                                                                                                                                                                                                                                                                                                                                                                                                                                                                                                                                                                                                                                                               |                                                                                                                                                                                                                                                                                                 |                                  |

|                 |                 |                                                                   |        |        |        |        |        |                                                                                                                                                                                                                                                                                                                      |                                                                                                                                                                                                                                                                                                                                                                                                   |
|-----------------|-----------------|-------------------------------------------------------------------|--------|--------|--------|--------|--------|----------------------------------------------------------------------------------------------------------------------------------------------------------------------------------------------------------------------------------------------------------------------------------------------------------------------|---------------------------------------------------------------------------------------------------------------------------------------------------------------------------------------------------------------------------------------------------------------------------------------------------------------------------------------------------------------------------------------------------|
| ENSG00000159921 | GNE             | glucosamine (UDP-N-acetyl)-2-epimerase/N-acetylmannosamine kinase | 0.119  | 0.079  | -0.283 | -0.205 | 0.568  | Encodes the rate-limiting enzyme in the sialic acid biosynthetic pathway; GNE-associated myopathy shows cellular changes in muscle similar to AD neurological changes; PMID: 30374284                                                                                                                                | Sialuria, (which exhibits some neurological abnormalities), OMIM #269921<br>Mutation associated with lathosterolosis (LATHOS), which includes neurological symptoms alongside other systemic abnormalities; stems from abnormal cholesterol synthesis, OMIM #607330, PMID:33204591                                                                                                                |
| ENSG00000109929 | SC5D            | sterol-C5-desaturase                                              | 0.112  | -0.057 | -0.225 | 0.009  | 0.603  | Cholesterol synthesis enzyme                                                                                                                                                                                                                                                                                         |                                                                                                                                                                                                                                                                                                                                                                                                   |
| ENSG00000197013 | ZNF429          | zinc finger protein 429                                           | 0.106  | 0.646  | -0.380 | -0.412 | 0.173  | Zinc finger protein; function unclear                                                                                                                                                                                                                                                                                |                                                                                                                                                                                                                                                                                                                                                                                                   |
| ENSG00000157110 | RBPMS           | RNA binding protein, mRNA processing factor                       | 0.070  | -0.058 | -0.227 | -0.141 | 0.546  | RNA binding protein with high expression in retina and heart; alternative splicing in smooth muscle; PMID: 21283468                                                                                                                                                                                                  |                                                                                                                                                                                                                                                                                                                                                                                                   |
| ENSG00000115323 | TACR1           | tachykinin receptor 1                                             | 0.029  | 0.218  | -0.075 | -0.001 | 0.577  | Receptor for substance P (a.k.a. neuropekin 1); decreased mRNA levels in ataxias/dystonias; PMID: 3357922                                                                                                                                                                                                            |                                                                                                                                                                                                                                                                                                                                                                                                   |
| ENSG00000145685 | LHFPL2          | LHFPL tetraspan subfamily member 2                                | 0.018  | 0.006  | 0.021  | 0.362  | 0.554  | Transmembrane protein with 4 TM domains; function unclear but mutation affects distal reproductive tract development; PMID:26964900                                                                                                                                                                                  | Variant associated with familial Parkinson disease age of onset; PMID:27402877                                                                                                                                                                                                                                                                                                                    |
| ENSG00000154451 | GBP5            | guanylate binding protein 5                                       | -0.001 | 0.068  | -0.147 | -0.224 | 0.577  | GTPase with a role in innate immunity and inflammation                                                                                                                                                                                                                                                               |                                                                                                                                                                                                                                                                                                                                                                                                   |
| ENSG00000141447 | OSBP1A          | oxysterol binding protein like 1A                                 | -0.029 | -0.165 | 0.114  | 0.610  | 0.198  | Intracellular lipid receptor; heterozygous mutation associated with low HDL levels; PMID:27105157                                                                                                                                                                                                                    |                                                                                                                                                                                                                                                                                                                                                                                                   |
| ENSG00000157193 | LRP8            | LDL receptor related protein 8                                    | -0.052 | -0.052 | -0.166 | -0.013 | 0.577  | Member of LDLR family; functions as a receptor for the cholesterol transport protein ApoE; participates in transmitting Reelin signaling in cerebellar and cortical layers during development; PMID: 10380922, a.k.a. ApoE2                                                                                          |                                                                                                                                                                                                                                                                                                                                                                                                   |
| ENSG00000196204 | RNF216P1        | ring finger protein 216 pseudogene 1                              | -0.094 | -0.071 | 0.044  | 0.027  | 0.546  | Pseudogene; function unclear                                                                                                                                                                                                                                                                                         |                                                                                                                                                                                                                                                                                                                                                                                                   |
| ENSG00000113070 | HBEFG           | heparin binding EGF like growth factor                            | -0.114 | 0.025  | 0.186  | 0.299  | 0.402  | Interacts with epidermal growth factor receptor (EGFR) and ERBB4; overexpression associated with metabolic diseases; PMID:32077785; cholesterol depletion induces its expression and release; PMID:21413023                                                                                                          |                                                                                                                                                                                                                                                                                                                                                                                                   |
| ENSG00000125657 | TNFSF9          | TNF superfamily member 9                                          | -0.130 | -0.141 | 0.179  | 0.307  | 0.576  | Cytokine; immunological/T cell activation function                                                                                                                                                                                                                                                                   |                                                                                                                                                                                                                                                                                                                                                                                                   |
| ENSG00000167202 | TBC1D2B         | TBC1 domain family member 2B                                      | -0.141 | -0.610 | 0.108  | 0.463  | 0.053  | GTPase activating protein; plays a role in vesicular trafficking, early endocytosis; recruited by RAB31 to inactivate RAB7, thus preventing multi-vesicular endosome fusion with lysosomes and allowing secretion of intraluminal vesicles; PMID:32958903                                                            | Homozygous/biallelic mutations cause Neurodevelopmental disorder with seizures and gingival overgrowth (NEDSGO), OMIM #619323                                                                                                                                                                                                                                                                     |
| ENSG00000116954 | RRAGC           | Ras related GTP binding C                                         | -0.145 | -0.261 | 0.203  | 0.565  | 0.624  | Monomeric G protein; recruits mTORC to lysosome in stress response; crucial regulator of TFEB phosphorylation by mTORC in response to amino acids; PMID:329225, 30552228                                                                                                                                             |                                                                                                                                                                                                                                                                                                                                                                                                   |
| ENSG00000113396 | SLC27A6         | solute carrier family 27 member 6                                 | -0.146 | -0.613 | 0.168  | 0.365  | 0.059  | Fatty acid transport protein; also acts as liver-specific acyl-CoA synthetase involved in uptake of long-chain fatty acids; may regulate fatty acid metabolism in mammary tissue; PMID:34100479, is downstream of SREBP-1, PMID:29846631; mutation of drosophila ortholog causes neurodegeneration; PMID:26893370    |                                                                                                                                                                                                                                                                                                                                                                                                   |
| ENSG00000184588 | PDE4B           | phosphodiesterase 4B                                              | -0.195 | -0.073 | 0.187  | 0.114  | 0.625  | PDEs break down cyclic nucleotides; plays pivotal role in brain signaling; PMID: 32438015                                                                                                                                                                                                                            |                                                                                                                                                                                                                                                                                                                                                                                                   |
| ENSG00000224885 | EIPR1           | Intronic transcript 1                                             | -0.218 | -0.325 | 0.076  | 0.632  | 0.235  | Intronic transcript, lncRNA, function unclear, a.k.a. EIPR1-1T1                                                                                                                                                                                                                                                      |                                                                                                                                                                                                                                                                                                                                                                                                   |
| ENSG00000233762 | ENSG00000233762 | ribosomal protein S15 pseudogene 4                                | -0.218 | -0.185 | 0.111  | 0.193  | 0.548  | Pseudogene                                                                                                                                                                                                                                                                                                           |                                                                                                                                                                                                                                                                                                                                                                                                   |
| ENSG00000136235 | GPNMB           | glycoprotein nmb                                                  | -0.219 | -0.448 | 0.248  | 0.647  | 0.107  | Potential NPC1 biomarker; upregulated in NPC patients and mouse models; downregulated with HPBCD treatment; PMID:26771826, 33466390, 34296265                                                                                                                                                                        |                                                                                                                                                                                                                                                                                                                                                                                                   |
| ENSG00000171456 | ASXL1           | ASXL transcriptional regulator 1                                  | -0.242 | -0.118 | 0.607  | 0.232  | -0.055 | Chromatin binding protein; regulates adipogenesis; PMID: 21047783                                                                                                                                                                                                                                                    | Heterozygous mutation associated with Bohring-Opitz syndrome, which has profound mental retardation along with other neurological symptoms, OMIM #605039                                                                                                                                                                                                                                          |
| ENSG00000249803 | ENSG00000249803 | novel transcript                                                  | -0.256 | -0.459 | 0.239  | 0.620  | -0.108 | Long non-coding RNA, function unclear                                                                                                                                                                                                                                                                                |                                                                                                                                                                                                                                                                                                                                                                                                   |
| ENSG00000233250 | ENSG00000233250 | novel transcript                                                  | -0.263 | -0.120 | 0.185  | 0.378  | 0.594  | Long non-coding RNA, function unclear                                                                                                                                                                                                                                                                                |                                                                                                                                                                                                                                                                                                                                                                                                   |
| ENSG00000099194 | SCD             | stearoyl-CoA desaturase                                           | -0.276 | -0.091 | 0.118  | 0.169  | 0.589  | Enzyme in unsaturated fatty acid biosynthesis, primarily oleic acid; important for normal autophagy; PMID: 26293158                                                                                                                                                                                                  |                                                                                                                                                                                                                                                                                                                                                                                                   |
| ENSG00000052802 | MSMO1           | methylsterol monooxygenase 1                                      | -0.286 | -0.023 | 0.024  | 0.239  | 0.621  | Cholesterol synthesis enzyme                                                                                                                                                                                                                                                                                         |                                                                                                                                                                                                                                                                                                                                                                                                   |
| ENSG00000113161 | HMGCR           | 3-hydroxy-3-methylglutaryl-CoA reductase                          | -0.287 | -0.004 | 0.064  | 0.250  | 0.581  | Cholesterol synthesis enzyme                                                                                                                                                                                                                                                                                         |                                                                                                                                                                                                                                                                                                                                                                                                   |
| ENSG00000067064 | ID1             | isopentenyl-diphosphate delta isomerase 1                         | -0.315 | -0.003 | 0.024  | 0.227  | 0.626  | Cholesterol synthesis enzyme                                                                                                                                                                                                                                                                                         |                                                                                                                                                                                                                                                                                                                                                                                                   |
| ENSG00000239857 | GET4            | guided entry of tail-anchored proteins factor 4                   | -0.325 | -0.099 | 0.604  | 0.385  | -0.120 | Part of the transmembrane domain recognition complex (TRC), which targets cytoplasmic C-terminal tail-anchored proteins to ER, Golgi, and mitochondrial membranes                                                                                                                                                    |                                                                                                                                                                                                                                                                                                                                                                                                   |
| ENSG00000120437 | ACAT2           | acetyl-CoA acetyltransferase 2                                    | -0.331 | -0.014 | 0.107  | 0.225  | 0.552  | Cholesterol synthesis enzyme                                                                                                                                                                                                                                                                                         |                                                                                                                                                                                                                                                                                                                                                                                                   |
| ENSG00000204160 | ZDHHC18         | zinc finger DHHC-type palmitoyltransferase 18                     | -0.331 | -0.300 | 0.591  | 0.402  | 0.164  | Golgi-resident palmitoyl transferase                                                                                                                                                                                                                                                                                 |                                                                                                                                                                                                                                                                                                                                                                                                   |
| ENSG00000225190 | PLEKHM1         | pleckstrin homology and RUN domain containing M1                  | -0.348 | -0.384 | 0.426  | 0.605  | 0.061  | Acts as endolysosomal adaptor to mediate autophagosome/lysosome fusion, regulated by MTOR; PMID:33452816; also regulated by PI4P-Rab7 pathway (PI4P produced by PI4KA, another sig. gene); PMID:31368593                                                                                                             |                                                                                                                                                                                                                                                                                                                                                                                                   |
| ENSG00000054116 | TRAPPC3         | trafficking protein particle complex 3                            | -0.364 | -0.343 | 0.382  | 0.599  | 0.045  | Part of the TRAPP complex, which tethers transport vesicles to the cis-Golgi membrane; specifically regulates transport from ER to golgi; PMID:15728249                                                                                                                                                              |                                                                                                                                                                                                                                                                                                                                                                                                   |
| ENSG00000112972 | HMGCS1          | 3-hydroxy-3-methylglutaryl-CoA synthase 1                         | -0.372 | -0.010 | 0.101  | 0.239  | 0.617  | Cholesterol synthesis enzyme                                                                                                                                                                                                                                                                                         |                                                                                                                                                                                                                                                                                                                                                                                                   |
| ENSG00000171302 | CANT1           | calcium activated nucleotidase 1                                  | -0.375 | -0.149 | 0.628  | 0.403  | 0.040  | Function unclear, member of the apyrase family, which are calcium-activated, plasma membrane-bound enzymes; highly expressed in clear cell renal cell carcinoma; PMID: 21102300                                                                                                                                      | Mutation associated with Desbuquois dysplasia 1, which involves numerous skeletal abnormalities as well as some neurological abnormalities, OMIM #251450                                                                                                                                                                                                                                          |
| ENSG00000104549 | SQLE            | squalene epoxidase                                                | -0.384 | -0.067 | 0.112  | 0.244  | 0.586  | Cholesterol synthesis enzyme; catalyzes the first oxygenation step in sterol biosynthesis and is thought to be one of the rate-limiting enzymes in this pathway                                                                                                                                                      |                                                                                                                                                                                                                                                                                                                                                                                                   |
| ENSG00000188211 | NCR3LG1         | natural killer cell cytotoxicity receptor 3 ligand 1              | -0.385 | -0.331 | 0.237  | 0.591  | 0.556  | Expressed on tumor cells; elicits natural killer cell cytotoxicity                                                                                                                                                                                                                                                   |                                                                                                                                                                                                                                                                                                                                                                                                   |
| ENSG00000166900 | STX3            | syntaxin 3                                                        | -0.398 | -0.368 | 0.485  | 0.567  | 0.626  | Regulates vesicle fusion and endocytosis associated with trafficking                                                                                                                                                                                                                                                 | Reports of two families with STX3 mutations and neurological phenotypes; PMID:3090251, 25358429                                                                                                                                                                                                                                                                                                   |
| ENSG00000225094 | ENSG00000225094 | SET pseudogene 20                                                 | -0.405 | -0.200 | 0.608  | 0.200  | -0.023 | Pseudogene, a.k.a. SETP20                                                                                                                                                                                                                                                                                            |                                                                                                                                                                                                                                                                                                                                                                                                   |
| ENSG00000154803 | FLCN            | folliculin                                                        | -0.410 | -0.466 | 0.395  | 0.750  | 0.637  | Regulates lysosomal positioning, nutrient sensing, and mTORC signaling to lysosomes; mutated in Birt-Hogg-Dubé (BHD) syndrome; PMID:33981707, 32612235, 32195250, 31672913                                                                                                                                           |                                                                                                                                                                                                                                                                                                                                                                                                   |
| ENSG00000113552 | GNPDA1          | glucosamine-6-phosphate deaminase 1                               | -0.421 | -0.394 | 0.447  | 0.731  | 0.235  | Part of carbohydrate metabolic pathway                                                                                                                                                                                                                                                                               |                                                                                                                                                                                                                                                                                                                                                                                                   |
| ENSG00000125386 | FAM193A         | family with sequence similarity 193 member A                      | -0.432 | -0.204 | 0.630  | 0.304  | -0.166 | Blinds and regulates PA2B, which is a 20S proteasome activator; PMID:29934401                                                                                                                                                                                                                                        |                                                                                                                                                                                                                                                                                                                                                                                                   |
| ENSG00000177372 | SOX2            | SRY-box transcription factor 12                                   | -0.436 | -0.072 | 0.613  | 0.365  | -0.167 | SRY box tx factor, SOX C group, promotes cell fate determination, PMID:26830765, promotes cancer progression and metastasis in various cancers                                                                                                                                                                       |                                                                                                                                                                                                                                                                                                                                                                                                   |
| ENSG00000259956 | RBM15B          | RNA binding motif protein 15B                                     | -0.440 | -0.482 | 0.592  | 0.459  | -0.176 | RNA binding motif protein with post-transcriptional regulatory activity; binds splicing factor compartment and the nuclear envelope as well as mRNA export factors NXF1 and Aly/REF; PMID:19586905, mediates NIST-directed transcriptional silencing; PMID:27602518                                                  |                                                                                                                                                                                                                                                                                                                                                                                                   |
| ENSG00000189410 | SH2D5           | SH2 domain containing 5                                           | -0.446 | -0.348 | 0.501  | 0.509  | 0.588  | Function unclear; enriched in brain, particularly cerebellar Purkinje cells; may regulate Rac1-GTP levels; PMID: 25331951                                                                                                                                                                                            |                                                                                                                                                                                                                                                                                                                                                                                                   |
| ENSG00000155252 | PI4KA           | phosphatidylinositol 4-kinase type 2 alpha                        | -0.451 | -0.491 | 0.424  | 0.681  | 0.219  | Phosphorylates Ptdins at the D-4 position, an essential step in the biosynthesis of Phosphatidylinositolpolyphosphates (PIPins); modulates phosphoinositide levels at autophosomes; accumulates in mouse models for hereditary spastic paraplegia; regulates autophagosome/lysosome fusion; PMID: 31368593, 33618608 | Homozygous nonsense mutation in one family associated with disorder showing global developmental delay, dystonia, disturbed sleep, and heat intolerance; another patient with homozygous missense mutation showed neurological phenotype and cutis laxa; PMID:32418222; mouse model shows neurological phenotype that includes cerebellar gliosis and Purkinje cell loss; PMID:30564627, 19581584 |
| ENSG00000118046 | STK11           | serine/threonine kinase 11                                        | -0.452 | -0.151 | 0.648  | 0.343  | -0.351 | "Master protein kinase," regulates cell polarity and energy metabolism, functioning to inhibit liver gluconeogenesis; PMID: 35731695; induces autophagy via AKB1, PMID: 28490492, 28561066 and many other refs, a.k.a. LKB1                                                                                          |                                                                                                                                                                                                                                                                                                                                                                                                   |
| ENSG00000186480 | INSIG1          | insulin induced gene 1                                            | -0.454 | -0.089 | 0.147  | 0.290  | 0.594  | Regulates cholesterol metabolism/homeostasis, lipogenesis, and glucose homeostasis; binds SCAP and facilitates retention of the SCAP/SREBP complex in the ER                                                                                                                                                         |                                                                                                                                                                                                                                                                                                                                                                                                   |
| ENSG00000166166 | TRMT61A         | tRNA methyltransferase 61A                                        | -0.462 | -0.301 | 0.634  | 0.418  | -0.063 | Functions in tRNA processing                                                                                                                                                                                                                                                                                         |                                                                                                                                                                                                                                                                                                                                                                                                   |
| ENSG00000004975 | DVL2            | dishevelled segment polarity protein 2                            | -0.465 | -0.381 | 0.380  | 0.614  | 0.121  | Involved in Wnt signaling pathway                                                                                                                                                                                                                                                                                    |                                                                                                                                                                                                                                                                                                                                                                                                   |
| ENSG00000136295 | TTYH3           | twenty family member 3                                            | -0.476 | -0.219 | 0.616  | 0.462  | -0.127 | Encodes large-conductance chloride channel, calcium dependent, so may regulate Ca2+ signalling; PMID: 15010458; widely expressed, with strong neuronal expression in early development; PMID: 34262434                                                                                                               |                                                                                                                                                                                                                                                                                                                                                                                                   |
| ENSG00000204713 | TRIM27          | tripartite motif containing 27                                    | -0.476 | -0.290 | 0.689  | 0.347  | -0.047 | E3 ubiquitin ligase that partners with USP7                                                                                                                                                                                                                                                                          |                                                                                                                                                                                                                                                                                                                                                                                                   |
| ENSG00000161011 | SQSTM1          | sequestosome 1                                                    | -0.489 | -0.463 | 0.547  | 0.610  | 0.321  | Critical autophagy regulatory protein; involved in mTOR signaling, cholesterol efflux under stress, nutrient sensing, inflammation; PMID:30499183, a.k.a. p62                                                                                                                                                        | Mutation associated with Frontotemporal dementia and/or amyotrophic lateral sclerosis 3 OMIM #616437; Neurodegeneration with ataxia, dystonia, and gaze palsy, childhood-onset, OMIM #617145                                                                                                                                                                                                      |
| ENSG00000160209 | PDKX            | pyridoxal kinase                                                  | -0.489 | -0.224 | 0.601  | 0.320  | 0.041  | Acts to phosphorylate Vitamin B6                                                                                                                                                                                                                                                                                     | Biallelic mutations associated with primary axonal polyneuropathy and optic atrophy, PMID: 31187503, OMIM #618511                                                                                                                                                                                                                                                                                 |
| ENSG00000076201 | PTPN23          | protein tyrosine phosphatase non-receptor type 23                 | -0.494 | -0.218 | 0.607  | 0.474  | -0.085 | Member of ESCRT (Endosomal Sorting Complexes Required for Transport); acts as tumor suppressor; also associated with chondrogenesis and RNA splicing; PMID: 31395947; regulates synaptic neuropeptide release; PMID:29378961                                                                                         | Mutation associated with Neurodevelopmental disorder and structural brain anomalies with or without seizures and spasticity, OMIM #618890, PMID: 31395947                                                                                                                                                                                                                                         |
| ENSG00000108861 | DUSP3           | dual specificity phosphatase 3                                    | -0.514 | -0.225 | 0.273  | 0.263  | 0.577  | Acts to dephosphorylate threonine/serine and tyrosine residues, known substrates include the MAPKs ERK and JNK, STAT5 and ErbB2; Dusp3 KO mice suggest it plays a role in obesity, insulin resistance, PMAF1D and liver damage; PMID:3732680                                                                         |                                                                                                                                                                                                                                                                                                                                                                                                   |
| ENSG00000138867 | GUCD1           | guanylyl cyclase domain containing 1                              | -0.537 | -0.243 | 0.660  | 0.481  | -0.050 | Converts GTP to cGMP; interacts with the E3 Ubiquitin ligase NEDD4, regulates liver regeneration; PMID: 24743017                                                                                                                                                                                                     |                                                                                                                                                                                                                                                                                                                                                                                                   |
| ENSG00000269190 | FBOXL7          | F-box protein 17                                                  | -0.546 | -0.178 | 0.600  | 0.192  | -0.145 | Part of SCF complexes (formed by SKP1, cullin (CUL1), and F-box proteins), which act as protein-ubiquitin ligases; promotes cell proliferation, activates Akt, Wnt-betaatenin pathway                                                                                                                                |                                                                                                                                                                                                                                                                                                                                                                                                   |
| ENSG00000205903 | ZNF316          | zinc finger protein 316                                           | -0.546 | -0.245 | 0.657  | 0.525  | 0.083  | Zinc finger protein; function unclear                                                                                                                                                                                                                                                                                |                                                                                                                                                                                                                                                                                                                                                                                                   |
| ENSG00000107263 | RAPGEF1         | Rap guanine nucleotide exchange factor 1                          | -0.548 | -0.262 | 0.641  | 0.364  | -0.099 | Adaptor protein, ubiquitous, essential for normal development; promotes ERK1/2 phosphorylation, involved in cell adhesion and neuronal migration, neural precursor population size, neuronal migration; PMID:16858399, 18506028, a.k.a. C3G                                                                          | Two patients from consanguineous family with homozygous mutations and neuropsychiatric disorder, PMID:33834495                                                                                                                                                                                                                                                                                    |
| ENSG00000135632 | SMYD5           | SMYD family member 5                                              | -0.582 | -0.304 | 0.650  | 0.337  | -0.203 | Regulates heterochromatin and chromosome integrity during ES cell differentiation; PMID: 28951459; contains SET and MYND domains for lysine methylation and protein-protein interaction, respectively                                                                                                                |                                                                                                                                                                                                                                                                                                                                                                                                   |
| ENSG00000232629 | HLA-DQB2        | major histocompatibility complex, class II, DQ beta 2             | -0.593 | -0.438 | 0.324  | 0.274  | 0.090  | Part of the major histocompatibility complex                                                                                                                                                                                                                                                                         |                                                                                                                                                                                                                                                                                                                                                                                                   |
| ENSG00000140474 | ULK3            | unc-51 like kinase 3                                              | -0.595 | -0.515 | 0.455  | 0.589  | 0.070  | Interacts with ESCRT complexes, governing the timing of membrane abscission in exosome budding and cytokinesis; PMID:3419098; also regulates autophagy; PMID:33988680, 27717182                                                                                                                                      |                                                                                                                                                                                                                                                                                                                                                                                                   |
| ENSG00000185019 | UBOX5           | U-box domain containing 5                                         | -0.598 | -0.190 | 0.295  | 0.112  | -0.138 | Encodes lncRNA, involved in ubiquitin-mediated proteolysis, upregulated in endometriosis                                                                                                                                                                                                                             |                                                                                                                                                                                                                                                                                                                                                                                                   |

|                 |        |                                                   |        |        |       |       |        |                                                                                                                                                                                                                                                                                                                                                                                                                                                                                                 |
|-----------------|--------|---------------------------------------------------|--------|--------|-------|-------|--------|-------------------------------------------------------------------------------------------------------------------------------------------------------------------------------------------------------------------------------------------------------------------------------------------------------------------------------------------------------------------------------------------------------------------------------------------------------------------------------------------------|
| ENSG00000119682 | AREL1  | apoptosis resistant E3 ubiquitin protein ligase 1 | -0.600 | -0.249 | 0.621 | 0.316 | 0.323  | E3 ubiquitin ligase that limits cellular response to apoptosis                                                                                                                                                                                                                                                                                                                                                                                                                                  |
| ENSG00000163719 | MTMR14 | myotubularin related protein 14                   | -0.600 | -0.315 | 0.577 | 0.333 | -0.243 | Muscle-specific inositol phosphatase, regulates muscle cell calcium homeostasis; regulates autophagy. KO mice fed a high fat diet showed greater obesity, lipid accumulation/dysfunction, and inflammation. PMID:27807764, 26697164                                                                                                                                                                                                                                                             |
| ENSG00000172794 | RAB37  | RAB37, member RAS oncogene family                 | -0.604 | -0.218 | 0.395 | 0.301 | 0.322  | GTPase which regulates vesicular trafficking; promotes autophagosome accumulation and regulates autophagosome biogenesis. PMID: 29229996, 29388490                                                                                                                                                                                                                                                                                                                                              |
| ENSG00000007376 | RPUSD1 | RNA pseudouridine synthase domain containing 1    | -0.604 | -0.163 | 0.529 | 0.386 | -0.057 | RNA binding protein, putative pseudouridine synthase activity                                                                                                                                                                                                                                                                                                                                                                                                                                   |
| ENSG00000118960 | HS1BP3 | HCLS1 binding protein 3                           | -0.604 | -0.490 | 0.485 | 0.732 | 0.268  | Autophagy inhibitor. PMID:28318354                                                                                                                                                                                                                                                                                                                                                                                                                                                              |
| ENSG00000040487 | PQLC2  | solute carrier family 66 member 1                 | -0.614 | -0.343 | 0.697 | 0.567 | 0.065  | Official name = SLC66A1, a.k.a. LAAT-1; Lysosomal cationic amino acid transporter, transports lysine and arginine at the lysosome, and knockdown causes enlarged lysosomes in <i>C. elegans</i> . PMID: 22822152, 23169667; recruits the Clorf72-SMCR8-WDR41 complex to lysosomes when amino acids are scarce. PMID:31851326, 33597295                                                                                                                                                          |
| ENSG00000126767 | ELK1   | ETS transcription factor ELK1                     | -0.617 | -0.314 | 0.378 | 0.323 | -0.203 | Tx factor with role downstream of EGFR and P38/Erk2 signaling; along with c-jun N-terminal kinase (JNK), plays role in HSP70-induced downregulation of ABCA1 and ABCG1, k.d. promotes atherosclerosis. PMID:29678642                                                                                                                                                                                                                                                                            |
| ENSG00000160410 | SHKBP1 | SHKBP1 binding protein 1                          | -0.617 | 0.011  | 0.484 | 0.283 | -0.043 | Member of the potassium channel tetramerization domain (KCTD) family of E3 ligases; acts upstream of EGFR to prevent its degradation; Shkgp1 ko mice show reduced tumors in comparison to wt when chemically induced to form tumors. PMID:34112919                                                                                                                                                                                                                                              |
| ENSG00000241973 | PI4KA  | phosphatidylinositol 4-kinase alpha               | -0.617 | -0.111 | 0.452 | 0.304 | -0.103 | Encodes phosphatidylinositol (PI) 4-kinase; generates the lipid signalling phosphoinositides, which act as signalling enzymes that control numerous aspects of cellular response to the extracellular environment; also aid in regulating membrane trafficking and lipid transport                                                                                                                                                                                                              |
| ENSG00000139722 | VPS37B | VPS37B subunit of ESCRT-I                         | -0.619 | -0.441 | 0.452 | 0.520 | 0.133  | Part of endosomal sorting complex (ESCRT-1), which performs roles in autophagosome closure, multivesicular body biogenesis, and cytokinesis; knockdown in cell culture causes cell stress response. PMID:33419951                                                                                                                                                                                                                                                                               |
| ENSG0000011021  | CLCN6  | chloride voltage-gated channel 6                  | -0.620 | -0.189 | 0.310 | 0.399 | 0.184  | Encodes a transmembrane Cl <sup>-</sup> /H <sup>+</sup> exchanger on late endosomes; modulates luminal ion composition; expressed in nervous system; expression of human mutation caused autophagosome accumulation and impaired the clearance of autophagosomes by blocking autophagosome-lysosome fusion. PMID:33590434; mutations in mouse caused phenotypes consistent with lysosomal storage abnormalities as well as a slowly progressing neurological phenotype. PMID:16950870, 21107136 |
| ENSG00000163930 | BAP1   | BRCA1 associated protein 1                        | -0.623 | -0.248 | 0.608 | 0.458 | 0.009  | Encodes nuclear ubiquitin carboxy-terminal hydrolase / deubiquitinase; upstream regulator of mTOR signaling. PMID:32819560; downregulation in inducible mouse model was associated with increased cholesterol biosynthesis machinery and reduced expression of gluconeogenic and lipid homeostasis proteins in liver. PMID:27373151; inhibits autophagy in melanoma cells. PMID:33516665                                                                                                        |
| ENSG00000167716 | WDR81  | WD repeat domain 81                               | -0.626 | -0.287 | 0.541 | 0.467 | 0.110  | Interacts with WDR91 as part of an endosomal protein complex that inhibits PI3 Kinase, which permits loss of Ptlns3P and allows conversion of early to late endosomes. PMID: 26975852; important for late endosome fusion. PMID:27126989; also important role in autophagy. PMID:23404643                                                                                                                                                                                                       |
| ENSG00000100897 | DCAF11 | DOB1 and CUL4 associated factor 11                | -0.631 | -0.170 | 0.594 | 0.374 | -0.071 | E3 ubiquitin ligase; acts as E3 ligase substrate adaptor, mediating degradation of a variety of substrates, a.k.a. WDR23                                                                                                                                                                                                                                                                                                                                                                        |
| ENSG00000143569 | UBAP2L | ubiquitin associated protein 2 like               | -0.636 | -0.335 | 0.645 | 0.529 | -0.060 | RNA binding protein; tethering function enhances translation. PMID: 32807991                                                                                                                                                                                                                                                                                                                                                                                                                    |
| ENSG00000175283 | DOLK   | dolichol kinase                                   | -0.678 | -0.170 | 0.480 | 0.343 | 0.039  | Encodes the enzyme responsible for final step of the de novo biosynthesis of dolichol phosphate; involved in processes for protein glycosylation and GPI anchors in the ER                                                                                                                                                                                                                                                                                                                      |

<sup>a</sup>Rho values with significant p values <0.1 are shown in red and green for negative or positive correlations, respectively

<sup>b</sup>Function found at NCBI gene and from 5 PubMed searches: gene name + lysosome, cholesterol, lipids, NPC, and autophagy; Neurological disease association searches involved OMIM and PubMed searches

Childhood-onset neurodegeneration with hypotonia, respiratory insufficiency, and brain imaging abnormalities (CONRIBA) is caused by heterozygous mutation, OMIM #619173

Cerebellar ataxia, mental retardation, and dysequilibrium syndrome 2, OMIM #610185; Hydrocephalus, congenital, 3, with brain anomalies, OMIM #617967; mice homozygous for a WDR81 missense mutation show progressive ataxia along with Purkinje cell loss, PMID: 23595742; also regulates adult hippocampal neurogenesis. PMID: 30531956

Mutation associated with congenital disorder of glycosylation, type Im, OMIM# 610768; most common features are epilepsy, intellectual disability, myopathies, neuropathies and stroke-like episodes; in some patients, hypotonia, seizures, dysrhythmia, also regulates startle magnitude in zebrafish. PMID:34061829

Supplementary Table 2. *GNMB* is the only previously proposed protein biomarker with significant correlation of gene expression to clinical parameters in this NPC1 patient cohort.

| Ensembl gene ID | Symbol        | LysoTracker levels_rho (P value) | Age of first neurological symptom_rho (P value) | Age of onset_rho (P value) | Neurological severity score Score_rho (P value) | DeltaLTR_rho (P value) |
|-----------------|---------------|----------------------------------|-------------------------------------------------|----------------------------|-------------------------------------------------|------------------------|
| ENSG00000104327 | <i>CALB1</i>  | -0.3432 (0.5548)                 | 0.4445 (0.3386)                                 | 0.3307 (0.5779)            | -0.0929 (0.9101)                                | -0.1398 (0.8867)       |
| ENSG00000277632 | <i>CCL3</i>   | -0.3202 (0.5979)                 | 0.0962 (0.9060)                                 | 0.2080 (0.7510)            | -0.2088 (0.7500)                                | 0.3128 (0.6980)        |
| ENSG00000164733 | <i>CTSB</i>   | 0.1420 (0.8448)                  | -0.0434 (0.9639)                                | -0.2923 (0.6542)           | 0.0795 (0.9258)                                 | -0.1795 (0.8412)       |
| ENSG00000117984 | <i>CTSD</i>   | 0.3045 (0.6298)                  | -0.2773 (0.6833)                                | -0.2459 (0.7051)           | 0.1761 (0.7949)                                 | -0.0824 (0.9417)       |
| ENSG00000163131 | <i>CTSS</i>   | 0.1293 (0.8618)                  | -0.0814 (0.9226)                                | 0.0574 (0.9499)            | -0.0407 (0.9676)                                | -0.0540 (0.9656)       |
| ENSG00000121769 | <i>FABP3</i>  | 0.3370 (0.5663)                  | -0.2422 (0.7068)                                | -0.3274 (0.5834)           | 0.1170 (0.8768)                                 | 0.4039 (0.4486)        |
| ENSG00000136235 | <i>GNMB</i>   | <b>0.6465 (0.0424)</b>           | -0.2191 (0.7364)                                | -0.4482 (0.3310)           | 0.2485 (0.7022)                                 | 0.1073 (0.9200)        |
| ENSG00000243955 | <i>GSTA1</i>  | -0.1407 (0.8477)                 | 0.2057 (0.7510)                                 | 0.1039 (0.8938)            | 0.0261 (0.9805)                                 | 0.0129 (0.9939)        |
| ENSG00000170606 | <i>HSPA4</i>  | 0.1353 (0.8569)                  | 0.1401 (0.8490)                                 | -0.1345 (0.8569)           | -0.1264 (0.8663)                                | 0.1338 (0.8912)        |
| ENSG00000131981 | <i>LGALS3</i> | 0.1317 (0.8570)                  | -0.0391 (0.9695)                                | 0.1727 (0.7965)            | -0.0270 (0.9791)                                | -0.1216 (0.9044)       |
| ENSG00000090382 | <i>LYZ</i>    | NA                               | NA                                              | NA                         | NA                                              | NA                     |
| ENSG00000186868 | <i>MAPT</i>   | 0.1642 (0.8122)                  | -0.1342 (0.8569)                                | -0.2834 (0.6710)           | 0.0013 (0.9988)                                 | -0.0056 (0.9950)       |
| ENSG00000142168 | <i>SOD1</i>   | -0.1257 (0.8663)                 | -0.1753 (0.7949)                                | 0.1363 (0.8564)            | -0.0917 (0.9101)                                | -0.0992 (0.9270)       |

Supplementary Table 3. Drug target candidates within the significantly correlated gene list.

| Gene     | Category                                   | Sources                                                                                                                                | Number of drug interactions |
|----------|--------------------------------------------|----------------------------------------------------------------------------------------------------------------------------------------|-----------------------------|
| ASXL1    | CLINICALLY ACTIONABLE                      | MskImpact   FoundationOneGenes   CarisMolecularIntelligence   Tempus                                                                   | 2                           |
| BAP1     | CLINICALLY ACTIONABLE                      | MskImpact   FoundationOneGenes   CarisMolecularIntelligence   Oncomine   Tempus                                                        | 6                           |
| CANT1    | CLINICALLY ACTIONABLE                      | CarisMolecularIntelligence                                                                                                             |                             |
| DPYD     | CLINICALLY ACTIONABLE and DRUGGABLE GENOME | Tempus   CIViC and HingoraniCasas   RussLampel                                                                                         | 9                           |
| FLCN     | CLINICALLY ACTIONABLE                      | MskImpact   FoundationOneGenes   CarisMolecularIntelligence   Tempus                                                                   | 2                           |
| H19      | CLINICALLY ACTIONABLE                      | Tempus                                                                                                                                 |                             |
| HLA-DQB2 | CLINICALLY ACTIONABLE                      | Tempus                                                                                                                                 |                             |
| PIK3CA   | CLINICALLY ACTIONABLE and DRUGGABLE GENOME | MskImpact   FoundationOneGenes   CarisMolecularIntelligence   Oncomine   Tempus   CIViC and HopkinsGroom   RussLampel   HingoraniCasas | 152                         |
| RSF1     | CLINICALLY ACTIONABLE                      | Tempus                                                                                                                                 |                             |
| STK11    | CLINICALLY ACTIONABLE and DRUGGABLE GENOME | MskImpact   FoundationOneGenes   CarisMolecularIntelligence   Oncomine   Tempus and RussLampel   HingoraniCasas   HopkinsGroom         | 23                          |
| TRIM27   | CLINICALLY ACTIONABLE and DRUGGABLE GENOME | CarisMolecularIntelligence and HopkinsGroom                                                                                            |                             |
| BIRC2    | DRUGGABLE GENOME                           | HingoraniCasas                                                                                                                         | 7                           |
| CLCN6    | DRUGGABLE GENOME                           | HopkinsGroom   RussLampel                                                                                                              |                             |
| DUSP3    | DRUGGABLE GENOME                           | HingoraniCasas   RussLampel   HopkinsGroom                                                                                             | 7                           |
| GNPMB    | DRUGGABLE GENOME                           | HingoraniCasas                                                                                                                         | 1                           |
| HBEGF    | DRUGGABLE GENOME                           | HingoraniCasas                                                                                                                         | 3                           |
| HMGR     | DRUGGABLE GENOME                           | RussLampel   HopkinsGroom   HingoraniCasas                                                                                             | 19                          |
| HMGS1    | DRUGGABLE GENOME                           | RussLampel   HopkinsGroom                                                                                                              |                             |
| LRP8     | DRUGGABLE GENOME                           | HingoraniCasas                                                                                                                         |                             |
| NXPH3    | DRUGGABLE GENOME                           | HingoraniCasas                                                                                                                         |                             |
| ODR4     | DRUGGABLE GENOME                           | HopkinsGroom                                                                                                                           |                             |
| PDE4B    | DRUGGABLE GENOME                           | HingoraniCasas   RussLampel   HopkinsGroom                                                                                             | 33                          |
| PDXK     | DRUGGABLE GENOME                           | RussLampel                                                                                                                             |                             |
| PI4K2A   | DRUGGABLE GENOME                           | HopkinsGroom                                                                                                                           | 1                           |
| PI4KA    | DRUGGABLE GENOME                           | HopkinsGroom   RussLampel                                                                                                              | 2                           |
| PTGIS    | DRUGGABLE GENOME                           | HopkinsGroom   RussLampel                                                                                                              | 1                           |
| PTPN23   | DRUGGABLE GENOME                           | HopkinsGroom   RussLampel                                                                                                              |                             |
| ROCK2    | DRUGGABLE GENOME                           | RussLampel   HopkinsGroom   HingoraniCasas                                                                                             | 34                          |
| SCD      | DRUGGABLE GENOME                           | HingoraniCasas                                                                                                                         | 5                           |
| SQLE     | DRUGGABLE GENOME                           | HingoraniCasas   RussLampel   HopkinsGroom                                                                                             | 3                           |
| TACR1    | DRUGGABLE GENOME                           | HingoraniCasas   HopkinsGroom   RussLampel                                                                                             | 36                          |
| TLR4     | DRUGGABLE GENOME                           | HingoraniCasas                                                                                                                         | 11                          |
| ULK3     | DRUGGABLE GENOME                           | HopkinsGroom   RussLampel   HingoraniCasas                                                                                             | 2                           |
| UTS2B    | DRUGGABLE GENOME                           | HingoraniCasas                                                                                                                         |                             |
| ACAT2    | ENZYME                                     | GuideToPharmacology   Pharos                                                                                                           |                             |
| AREL1    | ENZYME                                     | Pharos                                                                                                                                 |                             |
| GNPDA1   | ENZYME                                     | Pharos                                                                                                                                 |                             |
| IDI1     | ENZYME                                     | GuideToPharmacology   Pharos                                                                                                           |                             |
| MOMO1    | ENZYME                                     | HumanProteinAtlas                                                                                                                      |                             |
| POLK     | ENZYME                                     | Pharos                                                                                                                                 | 263                         |
| SC5D     | ENZYME                                     | HumanProteinAtlas   Pharos                                                                                                             |                             |
| SEPS2    | ENZYME                                     | HumanProteinAtlas                                                                                                                      |                             |
| SUCLA2   | ENZYME                                     | HumanProteinAtlas   Pharos                                                                                                             |                             |
| UBA5     | ENZYME                                     | Pharos                                                                                                                                 |                             |
| UBOX5    | ENZYME                                     | Pharos                                                                                                                                 |                             |
| UEVLD    | ENZYME                                     | Pharos                                                                                                                                 |                             |
| TTYH3    | ION CHANNEL                                | Pharos                                                                                                                                 |                             |
| CMPK1    | KINASE                                     | Pharos                                                                                                                                 | 3                           |
| DOLK     | KINASE                                     | Pharos                                                                                                                                 |                             |
| GNE      | KINASE                                     | Pharos                                                                                                                                 |                             |
| GORAB    | KINASE                                     | Pharos                                                                                                                                 |                             |
| TRIM23   | KINASE                                     | Pharos                                                                                                                                 |                             |
| WDR81    | KINASE                                     | Pharos                                                                                                                                 |                             |
| SMYD5    | METHYL TRANSFERASE                         | BaderLabGenes                                                                                                                          |                             |
| MTMR14   | MYOTUBULARIN RELATED PROTEIN PHOSPHATASE   | dGene                                                                                                                                  |                             |
| YME1L1   | PROTEASE                                   | dGene                                                                                                                                  |                             |
| SQSTM1   | SERINE THREONINE KINASE                    | GO                                                                                                                                     | 1                           |
| BDP1     | TRANSCRIPTION FACTOR                       | Pharos                                                                                                                                 |                             |
| ELK1     | TRANSCRIPTION FACTOR                       | Pharos                                                                                                                                 |                             |
| MBTPS2   | TRANSCRIPTION FACTOR                       | Pharos                                                                                                                                 |                             |
| MED13    | TRANSCRIPTION FACTOR                       | Pharos                                                                                                                                 |                             |
| PRDM5    | TRANSCRIPTION FACTOR                       | Pharos                                                                                                                                 |                             |
| SOX12    | TRANSCRIPTION FACTOR                       | Pharos                                                                                                                                 |                             |
| PQLC2    | TRANSPORTER                                | Pharos                                                                                                                                 |                             |
| SLC27A6  | TRANSPORTER                                | GuideToPharmacology   Pharos                                                                                                           |                             |
| SLC38A2  | TRANSPORTER                                | GuideToPharmacology   Pharos                                                                                                           |                             |
| SLC39A10 | TRANSPORTER                                | GuideToPharmacology   Pharos                                                                                                           |                             |
